# Supplementary material for: Low Concentration of Anti-Auxin and Anti-Fungal Agent Accelerates the PLB Regeneration of Dendrobium okinawense under Green LED
Source: MDPI journal article supplement (doi:10.3390/plants11081082), 2022-04-15
Supplement: s1 [file s1]

**Table S1.** Efficiency of sucrose concentrations for PLB organogenesis of *D. okinawense*.

| Sucrose (g/L) | Mean Number of PLBs | Fresh Weight (g)       | Mean Number of Shoots | PLBs Formation Rate |
|---------------|---------------------|------------------------|-----------------------|---------------------|
| 0             | 3.20 c $\pm$ 0.26   | 0.0267 d $\pm$ 0.00174 | 0.47 b $\pm$ 0.16     | 100%                |
| 5             | 5.12 ab $\pm$ 0.35  | 0.076 bc $\pm$ 0.00577 | 1.12 ab $\pm$ 0.22    | 100%                |
| 10            | 5.60 a $\pm$ 0.45   | 0.099 a $\pm$ 0.00723  | 1.83 a $\pm$ 0.29     | 100%                |
| 20            | 5.17 a $\pm$ 0.39   | 0.080 ab $\pm$ 0.00654 | 0.90 b $\pm$ 0.19     | 100%                |
| 30            | 5.33 a $\pm$ 0.49   | 0.060 bc $\pm$ 0.00548 | 1.30 ab $\pm$ 0.25    | 100%                |
| 40            | 3.33 bc $\pm$ 0.23  | 0.055 c $\pm$ 0.00300  | 1.13 ab $\pm$ 0.23    | 100%                |

Here; values are means  $\pm$  standard error (s.e.; n = 15); letters in the column that share a letter are statistically identical at  $p \leq 0.05$  by Tukey's multiple comparisons test at 95% confidence interval.
